# Supplementary material
Source: Research Square preprint supplement (doi:10.21203/rs.3.rs-8909591/v1)
Supplement: Supplementary file 1 [file 6f627bdadce3c0e16a82cdf4.docx]

**Supporting Information**

**Ionic liquid grafted PVDF membrane incorporating g-C3N4–Fe3O4 for selective cationic dye removal and antibiofouling performance**

Ameneh Lari1, Abdolmajid Bayandori Moghaddam 2, *, Mohammad-Hossein Sarrafzadeh 1, *

1 School of Chemical Engineering, College of Engineering, University of Tehran, Tehran, Iran. P.O. Box: 11155-4563, Tehran, Iran

2 School of Engineering Science, College of Engineering, University of Tehran, P.O. Box 11155-4563, Tehran, Iran

* Corresponding authors:

[sarrafzdh@ut.ac.ir](mailto:sarrafzdh@ut.ac.ir) **,** [bayandori@ut.ac.ir](mailto:bayandori@ut.ac.ir)

**
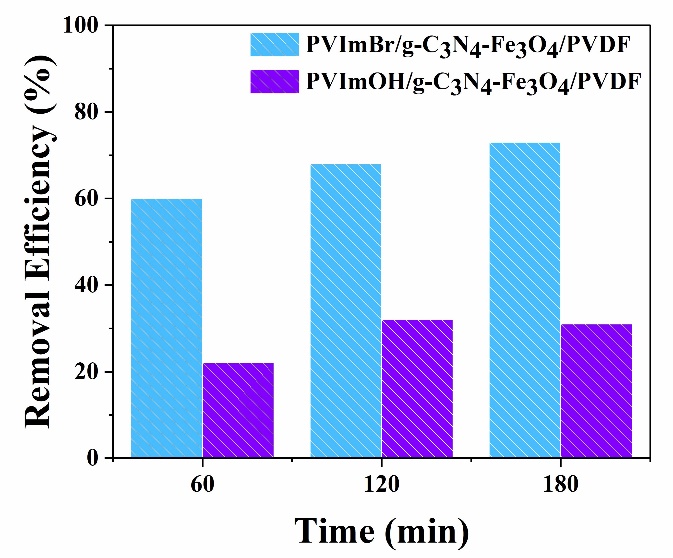
**

**Fig. S1.** Removal efficiency of methyl orange by PVImOH/g-C3N4-Fe3O4/PVDF and PVImBr/g-C3N4-Fe3O4/PVDF at 20 ppm.


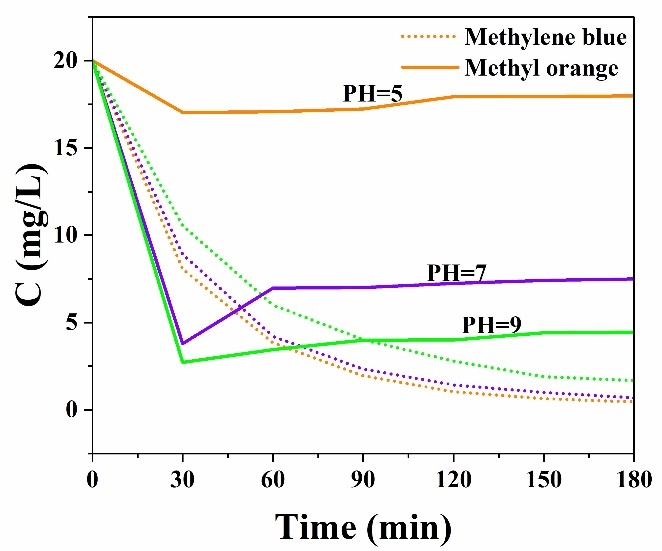


**Fig. S2.** Concentration changes of anionic and cationic dyes at pH 5, 7, and 9.


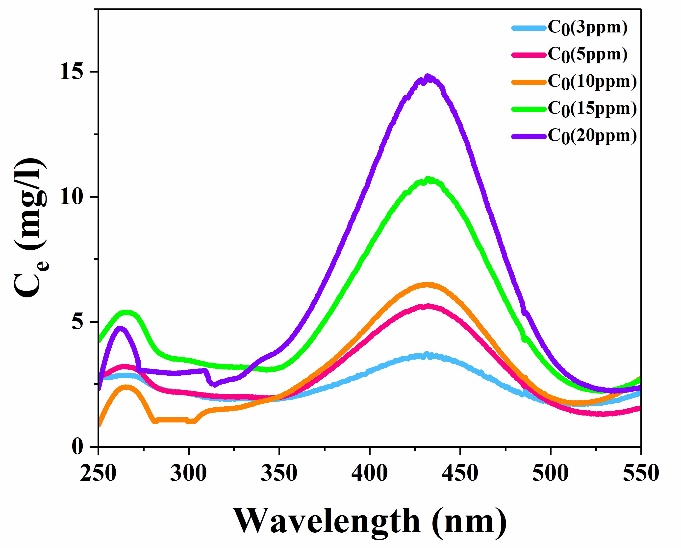

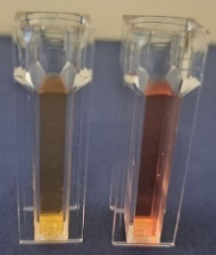


**Fig. S3.** Equilibrium plot of methylene blue at different initial concentrations.


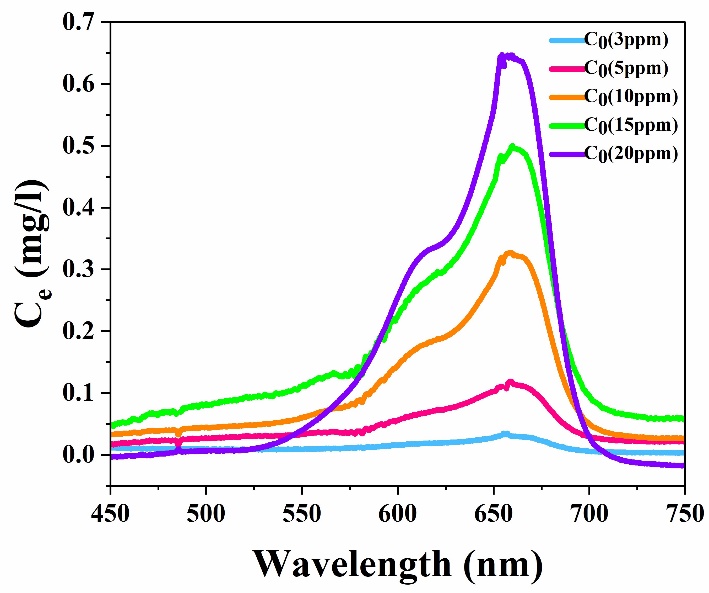

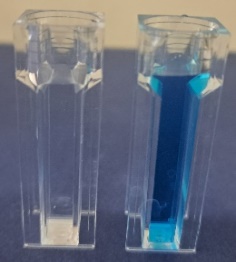


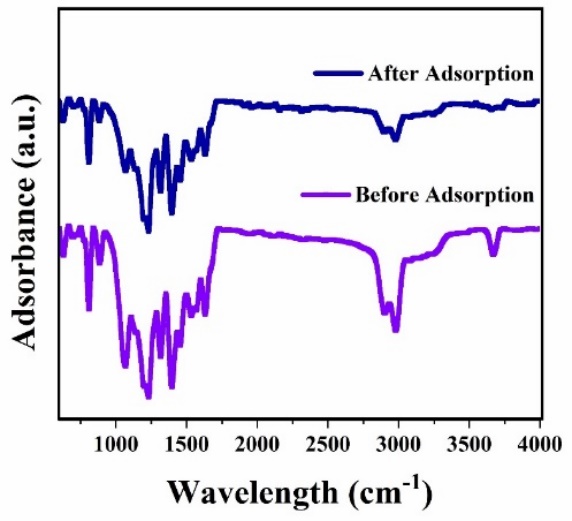


**Fig. S5.** ATR of the modified membrane before and after the methylene blue adsorption process.

**Fig. S4.** Equilibrium plot of methyl orange at different initial concentrations.
